# Supplementary material for: Hydrothermal metal recovery of metal-contaminated wastewater with forest residue: a zero waste discharge process
Source: Royal Society of Chemistry journal article supplement (doi:10.1039/d4ew00229f), 2024-01-01
Supplement: d4ew00229f1.pdf [file d4ew00229f1.pdf]

**Hydrothermal metal recovery of metal-contaminated wastewater with forest  
residue: A zero waste discharge process**

*Pankaj Kumar, Sivamohan N. Reddy\**

Department of Chemical Engineering, Indian Institute of Technology Roorkee, Uttarakhand,  
India

\* Corresponding author:

Dr. Sivamohan N. Reddy

Associate Professor

Department of Chemical Engineering

Indian Institute of Technology Roorkee, Uttarakhand, India 247 667

Email: [n.reddy@ch.iitr.ac.in](mailto:n.reddy@ch.iitr.ac.in)

Tel: +91-1332-284833; Fax: +91-1332-276535

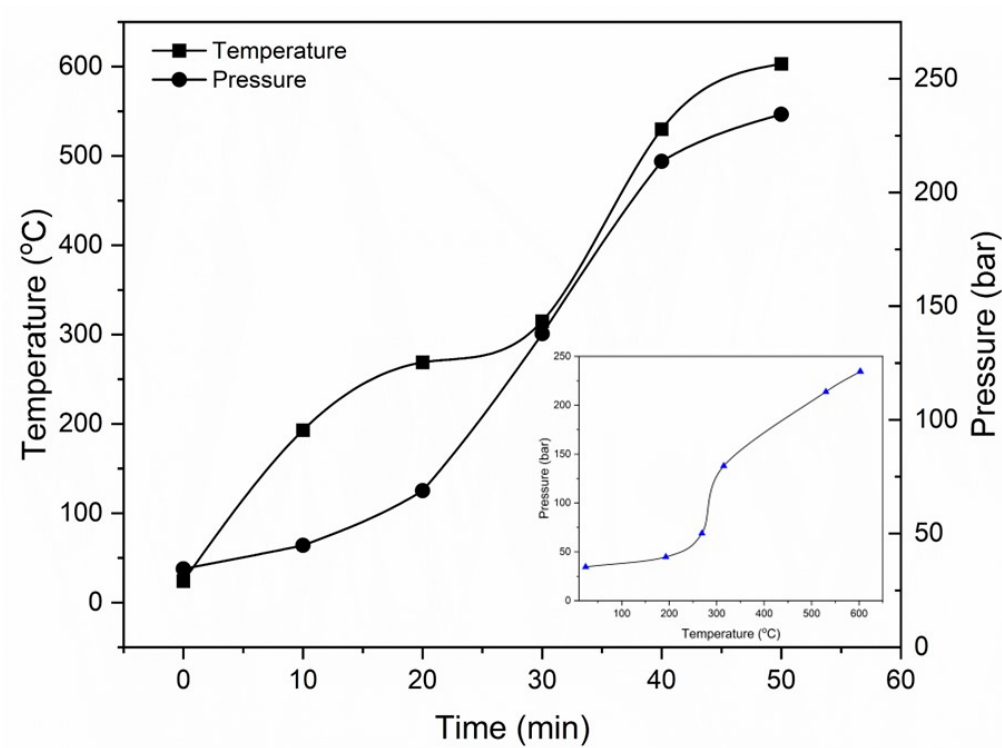

Fig. S1 Pressure and temperature profile w.r.t time in the reactor

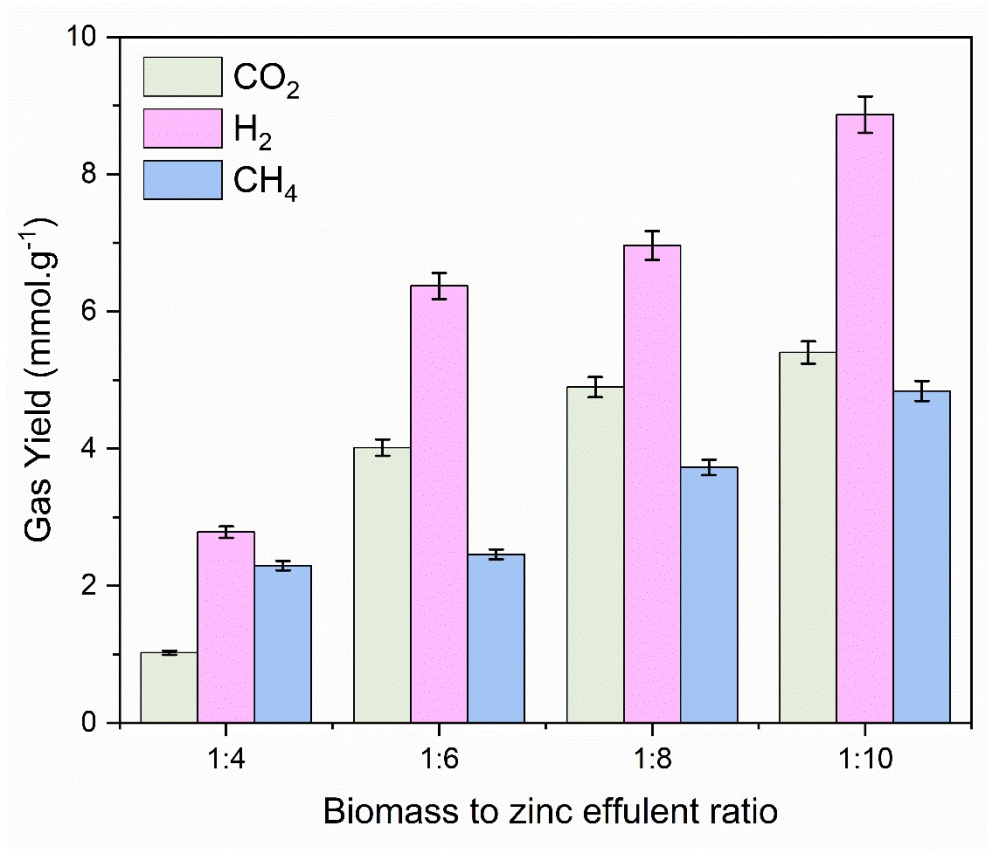

Fig. S2 Effect of feed concentration on gasification performance of simulated zinc metal effluent with pine needles at 600 C, B:SME::1:10 and 60 min.

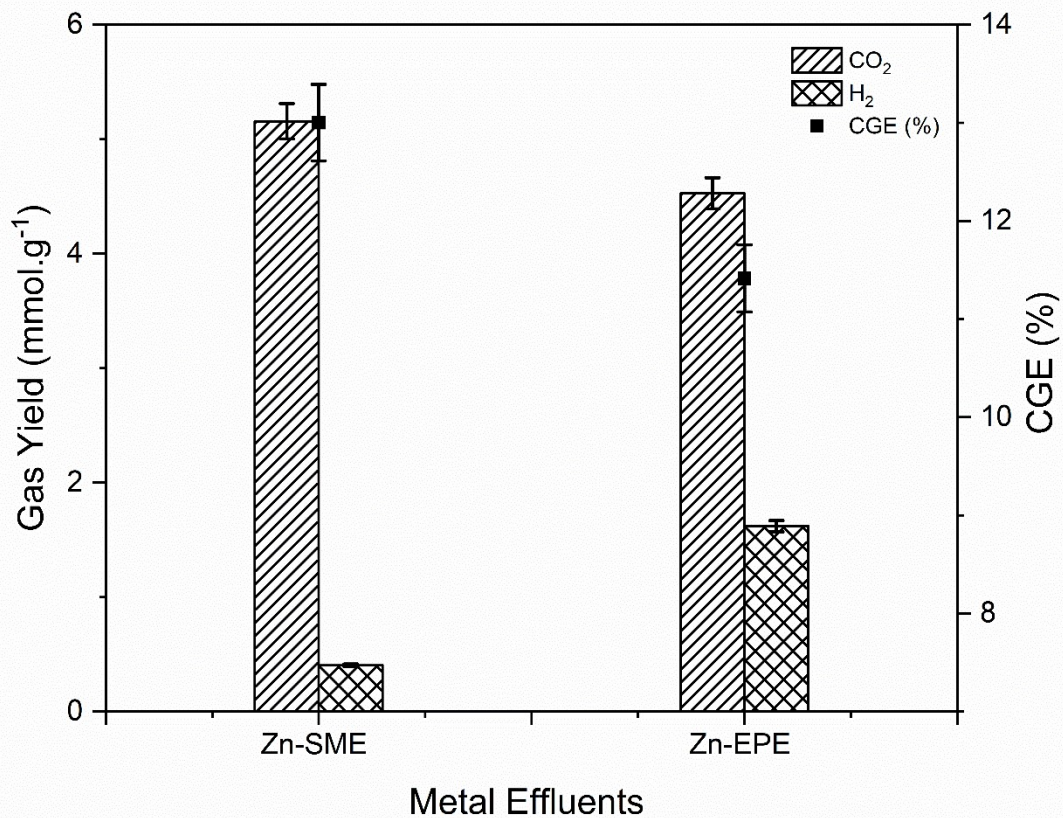

Fig. S3 Gasification performance of simulated zinc metal effluent (Zn-SME) and real electroplating metal effluent (Zn-EPE) with pine needles at 400 °C, 30 min, and biomass to metal effluent ratio 1:100.

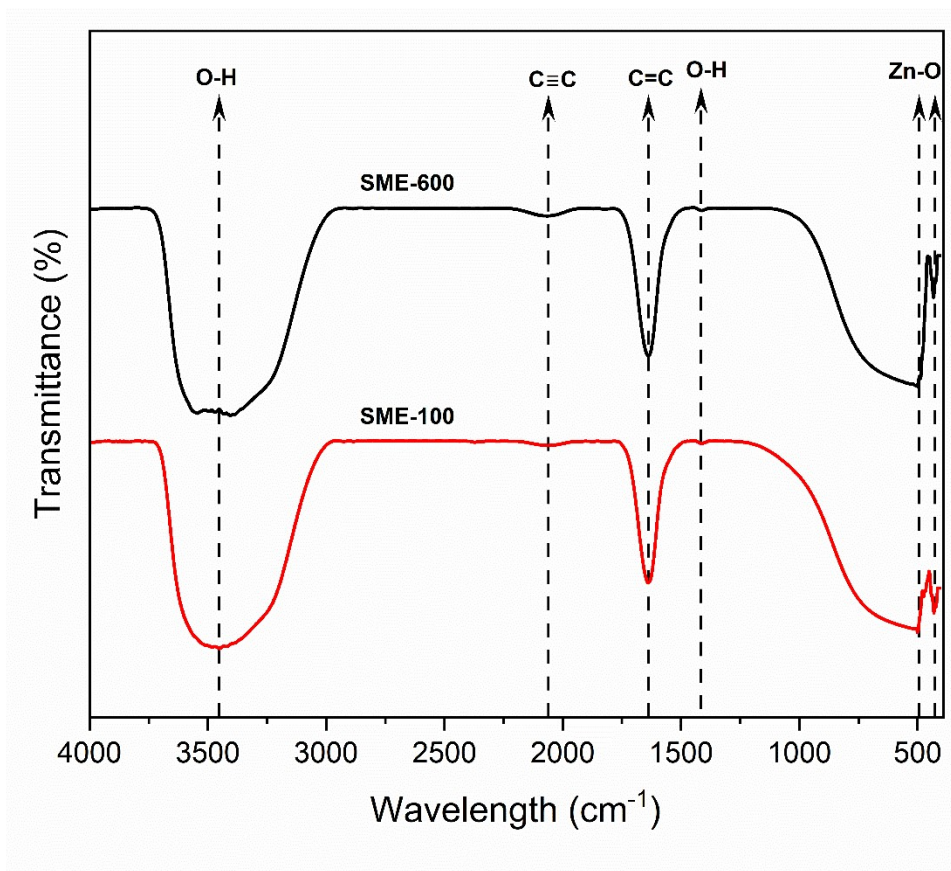

Fig. S4 FTIR spectra of the treated aqueous phase were obtained at 100 °C and 600 °C, 60 min residence time, and B: SME:1:10.

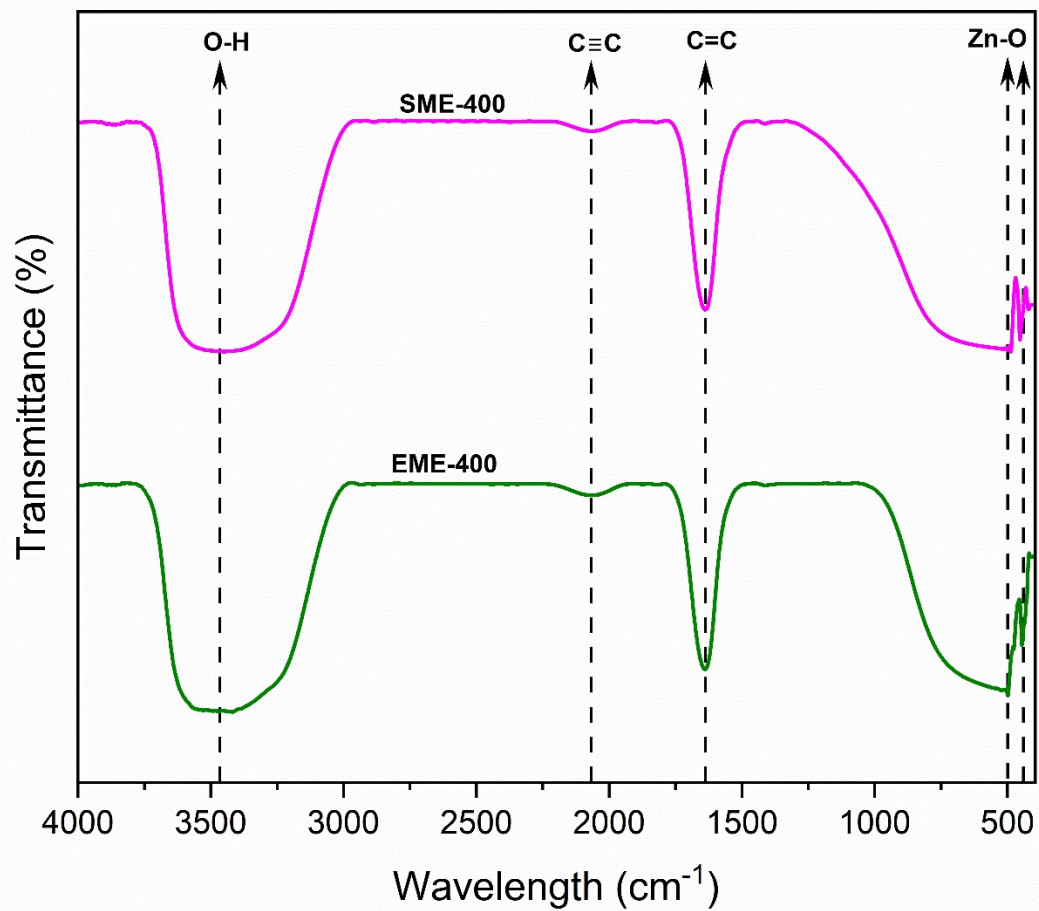

Fig. S5 FTIR spectra of the treated aqueous phase were obtained at 400 °C, 30 min residence time, and B: SME:1:100.

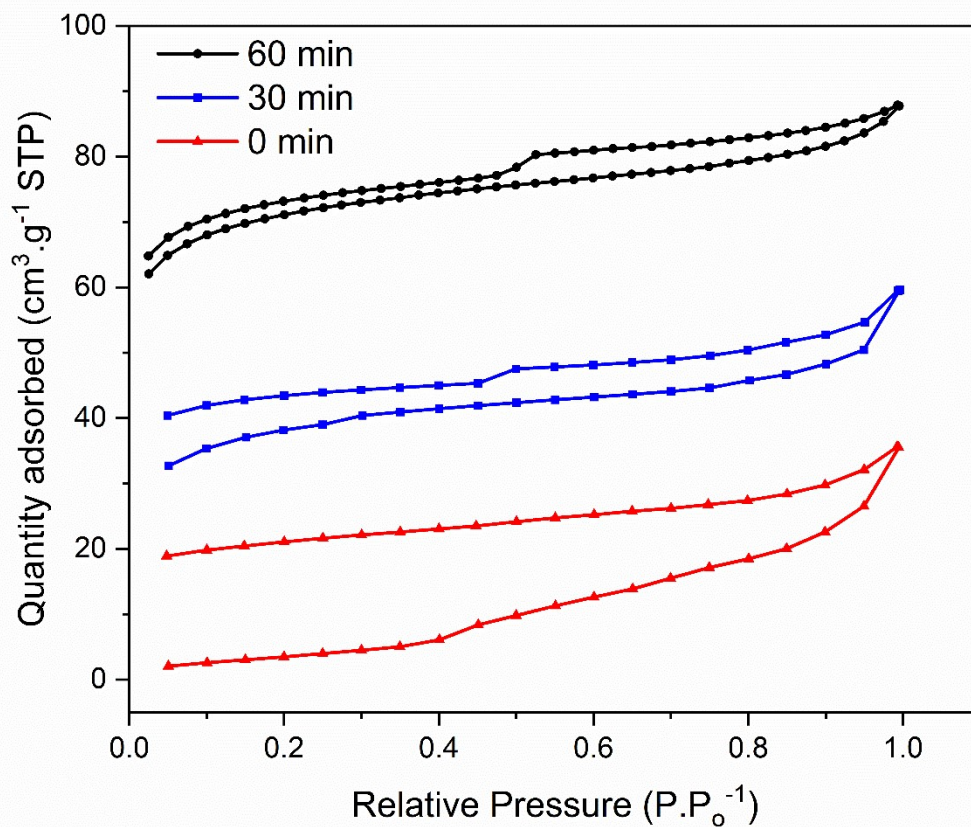

Fig. S6 Nitrogen adsorption-desorption isotherm of carbon composite obtained at 0 min, 30 min and 60 min at 600 °C and biomass to effluent ratio 1:10.

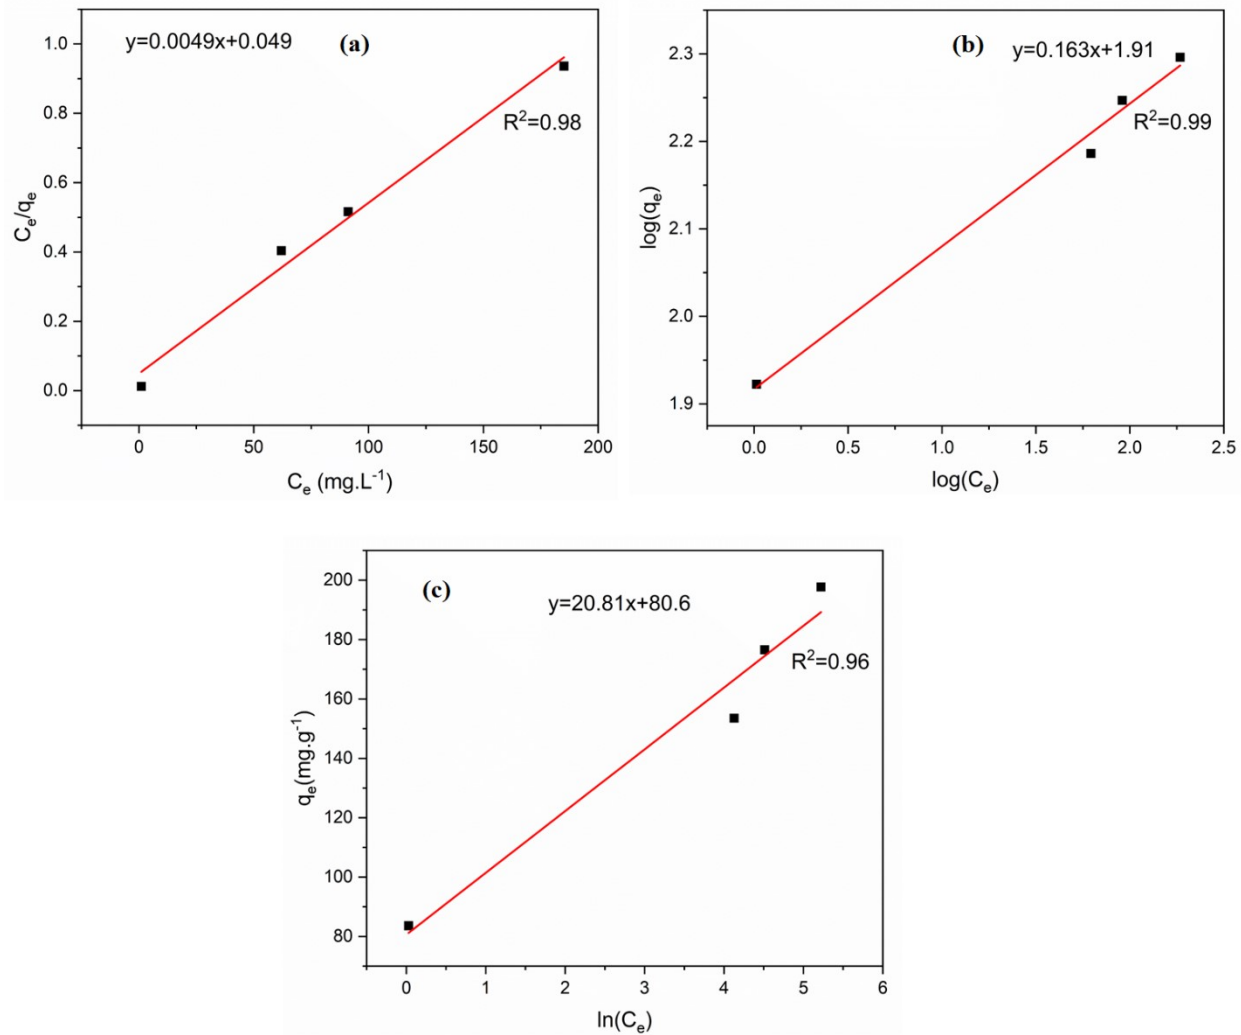

Fig. S7 Isotherm fitting of (a) Langmuir (b) Freundlich and (c) Temkin Models.



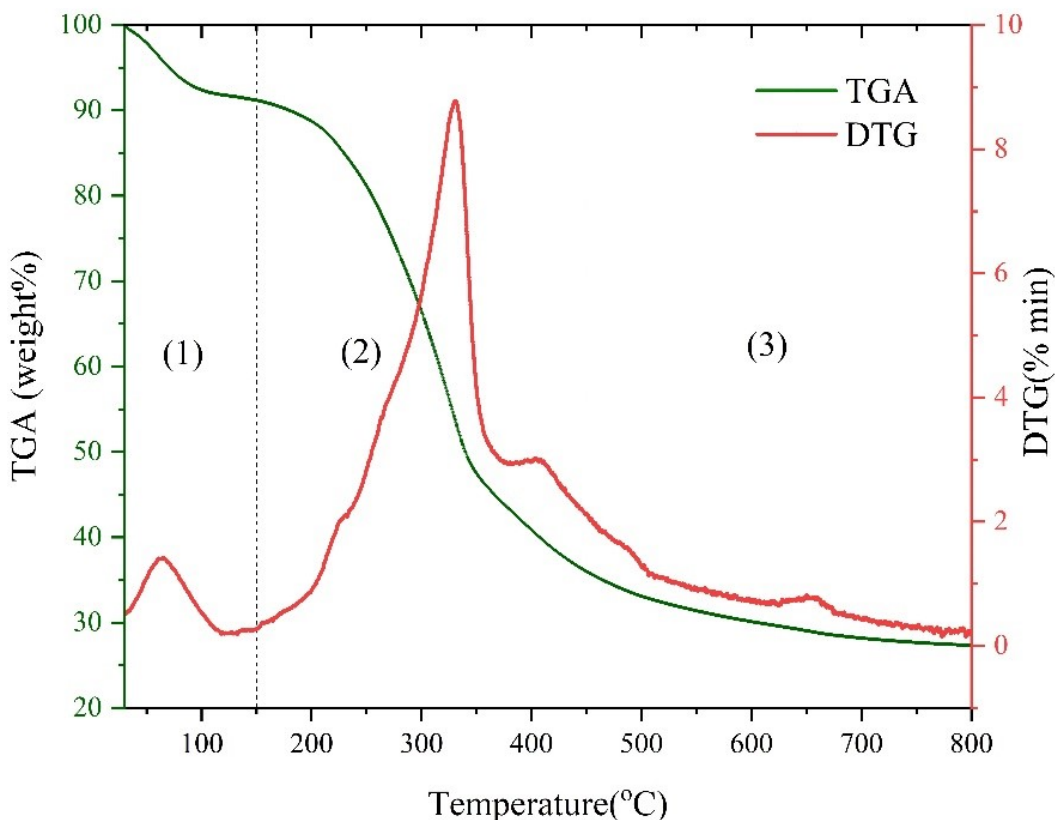

Fig. S8 Thermogravimetric and differential analysis of raw pine needles <sup>1</sup>.

### 1.1.1. TGA and DTG

The TGA/DTG analysis examined PN's thermal degradation behavior, as shown in Figure S7. The thermal degradation of PN was divided into three different stages. The first stage speaks of the valorization of high volatiles and moisture, due to which the PN degradation rate is slow in this stage (up to ~150 °C). Stage second (160-450 °C) exhibits the highest rate of PN degradation, representing the conversion of holocellulose illustrated by the peak at 320 °C. At the same time, the valorization of lignin and char formation is associated with stage three (450-800 °C), denoted by the different number of peaks in the wide temperature range. However, these processes can overlap and can't be clearly distinguished <sup>2</sup>. Havilah et al.<sup>3</sup> reported the

maximum devolatilization in the range 190 to 450 °C attributed to cellulose and hemicellulose, whereas the degradation of lignin corresponds to temperature 450 to 780 °C.

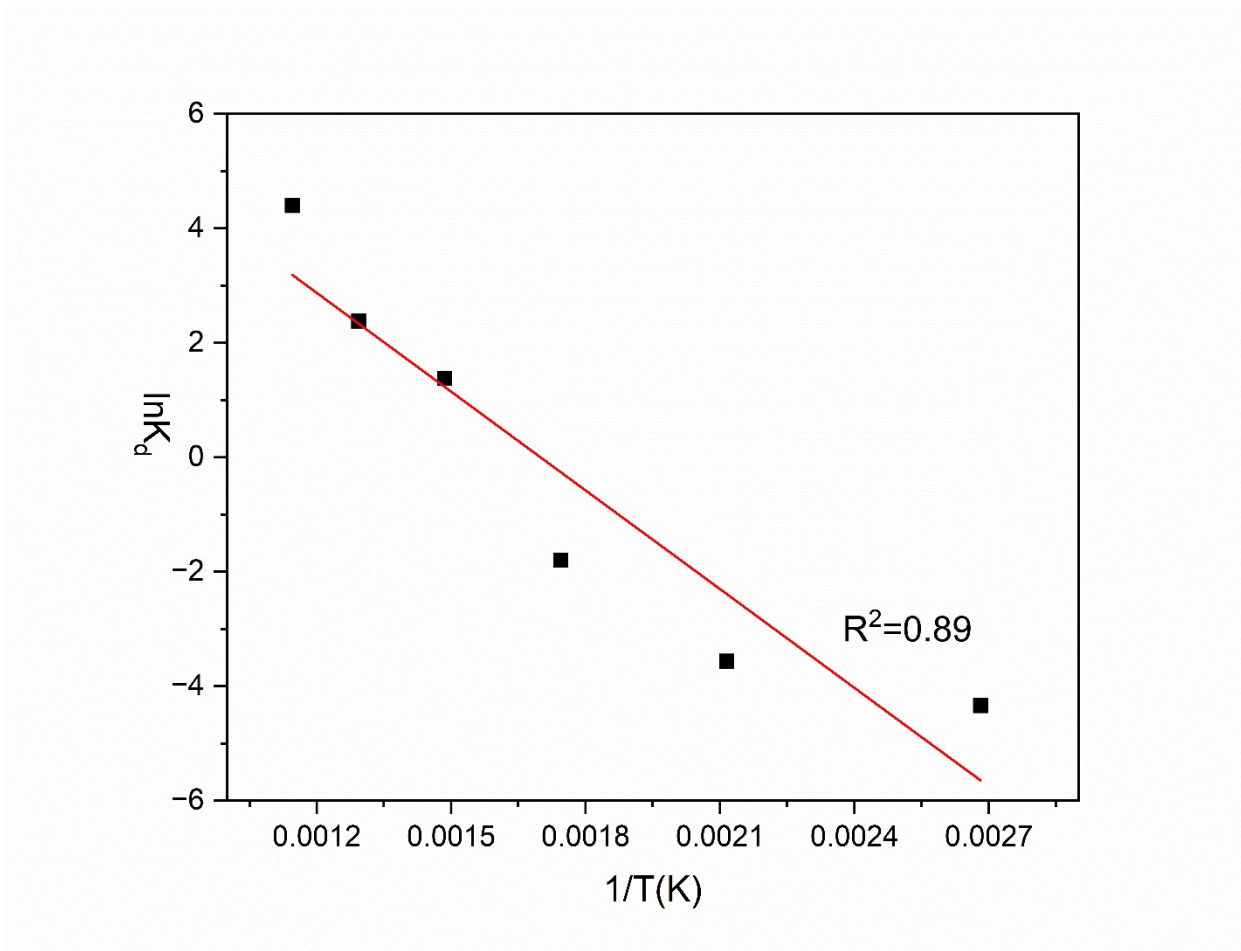

Fig .S9 Vont hoff model

Table S1. Initial characterization of real zinc electroplating wastewater (Zn-EPE) and simulated metal effluent.

| Sample   |          | Surface area (m <sup>2</sup> .g <sup>-1</sup> ) | Total pore volume (cm <sup>3</sup> .g <sup>-1</sup> ) |       |     |
|----------|----------|-------------------------------------------------|-------------------------------------------------------|-------|-----|
| Metal    | Metals   | Concentration                                   | Conductivity                                          | TDS   | pH  |
| 0 min    |          | 14.9                                            | 5.5x10 <sup>-2</sup>                                  |       |     |
| Effluent |          | (ppm)                                           | (mS)                                                  | (ppt) |     |
|          | Zinc     | 765                                             |                                                       |       |     |
|          | Iron     | 23                                              |                                                       |       |     |
| Zn-EPE   | Copper   | 25                                              | 0.38                                                  | 0.19  | 2.2 |
|          | Nickel   | 28                                              |                                                       |       |     |
|          | Chromium | 506                                             |                                                       |       |     |
| Zn-SME   | Zinc     | 1758                                            | 3.6                                                   | 1.8   | 4.2 |

Table S2. Specific surface area and total pore volume of carbon composite sample obtained at 0 min, 30 min and 60 min residence time.

|        |       |                       |
|--------|-------|-----------------------|
| 30 min | 122.2 | $9.2 \times 10^{-2}$  |
| 60 min | 221.1 | $1.36 \times 10^{-1}$ |

Table.S3 Ultimate and proximate analysis of pine needles <sup>1</sup>.

| Proximate analysis   |                 |                  | Ultimate analysis                                    |       |       |       |                    |     |     |      |
|----------------------|-----------------|------------------|------------------------------------------------------|-------|-------|-------|--------------------|-----|-----|------|
| Volatile content (%) | Ash Content (%) | Fixed Carbon (%) | C (%)                                                | H (%) | N (%) | S (%) | O <sup>a</sup> (%) | O/C | H/C | N/C  |
| 73.5                 | 2.1             | 24.4             | 47.8                                                 | 6.8   | 0.9   | --    | 42.4               | 0.7 | 1.7 | 0.02 |
| Empirical Formula    |                 |                  | CH <sub>1.7</sub> O <sub>0.7</sub> N <sub>0.02</sub> |       |       |       |                    |     |     |      |
| HHV(MJ/Kg)           |                 |                  | 19.16                                                |       |       |       |                    |     |     |      |

(a) Oxygen (O)=100-(C+H+N+Ash) %

#### *Ultimate and proximate analysis of feedstock*

The quality and quantity of products generated via thermochemical treatment of biomass depends on the elemental (C, H, and O) composition of biomass, along with the moisture, volatile, and ash content. Therefore, the ultimate and the proximate pine needles (PN) analysis was carried out as given in Table S3. The proximate analysis of PN illustrates that it contains high volatile content (~73.5 %) and low ash content (~2.1 %), ensuring the feasibility of using pine needles for thermal

degradations. The higher quantity of ash content is not desired for thermochemical treatment as it leads to slag formation and fouling, leading to reduced process efficiency <sup>4,5</sup>. The ultimate analysis was performed to determine the elemental composition of pine needles. The percentage of carbon, oxygen, and hydrogen in pine needles is found to be 47.8 %, 42.4 %, and 6.8 %, respectively, as well as negligible amounts of nitrogen (~0.9 %) and zero sulfur. The lower percentage of nitrogen and sulfur in biomass illustrates that upon thermochemical conversion, negligible quantities of SO<sub>x</sub> and NO<sub>x</sub> were produced. Similarly, Mandal et al. <sup>6</sup> reported that pine needles contain 49.47% carbon, 34.12% oxygen, and 1.05% nitrogen, which are the typical value of biomass.

Table. S4 Thermodynamic parameters for adsorption of zinc metal in hydrothermal process

| Temperature (K) | $\Delta G^\circ$ (kcal.mol <sup>-1</sup> ) | $\Delta H^\circ$ (kcal.mol <sup>-1</sup> ) | $\Delta S^\circ$ (kcal.mol <sup>-1</sup> ) |
|-----------------|--------------------------------------------|--------------------------------------------|--------------------------------------------|
| 373             | 13.46                                      | 47.81                                      | 0.08                                       |
| 473             | 14.00                                      |                                            |                                            |
| 573             | 8.565                                      |                                            |                                            |
| 673             | -7.70                                      |                                            |                                            |
| 773             | -15.300                                    |                                            |                                            |
| 873             | -31.92                                     |                                            |                                            |

## References

- 1 P. Kumar and S. N. Reddy, A circular approach for the treatment of aqueous metal effluent and biomass to generate superparamagnetic nanometal carbon hybrid and hydrogen-rich gas mixture, *Journal of Hazardous Materials Advances*, 2023, **9**, 100213.

- 2 E. Butnaru, D. Pamfil, E. Stoleru and M. Brebu, Characterization of bark, needles and cones from silver fir (*Abies alba* mill.) towards valorization of biomass forestry residues, *Biomass Bioenergy*, , DOI:10.1016/j.biombioe.2022.106413.
- 3 P. R. Havilah, P. K. Sharma and A. K. Sharma, Characterization, thermal and kinetic analysis of *Pinus roxburghii*, *Environ Dev Sustain*, 2021, **23**, 8872–8894.
- 4 Z. Luo, S. Wang, Y. Liao, J. Zhou, Y. Gu and K. Cen, Research on biomass fast pyrolysis for liquid fuel, *Biomass Bioenergy*, 2004, **26**, 455–462.
- 5 S. Nanda, P. Mohanty, K. K. Pant, S. Naik, J. A. Kozinski and A. K. Dalai, Characterization of North American lignocellulosic biomass and biochars in terms of their candidacy for alternate renewable fuels, *Bioenergy Res*, 2013, **6**, 663–677.
- 6 S. Mandal, J. Haydary, T. K. Bhattacharya, H. R. Tanna, J. Husar and A. Haz, Valorization of pine needles by thermal conversion to solid, liquid and gaseous fuels in a screw reactor, *Waste Biomass Valorization*, 2019, **10**, 3587–3599.
